# Supplementary material for: Urban Development Reduces Bee Abundance and Diversity
Source: Research Square preprint supplement (doi:10.21203/rs.3.rs-474308/v1), 2022-01-03
Supplement: Supplementary file 1 [file 2e3bf5c398f097fb56197af7.docx]

Supplemental Table 1

Bee species

*Agapostemon sericeus*

*Agapostemon virescens*

*Andrena bisalicis*

*Andrena crataegi*

*Andrena erythronii*

*Andrena milwaukensis*

*Andrena nasonii*

*Andrena nigrae*

*Andrena nuda*

*Andrena phaceliae*

*Andrena wellesleyana*

*Anthidium maculifrons*

*Anthidium manicatum*

*Anthidium oblongatum*

*Apis mellifera*

*Augochlora pura*

*Augochlorella aurata*

*Augochlorella persimilis*

*Augochlorella sp*

*Augochloropsis fulgada*

*Bombus affinis*

*Bombus bimaculatus*

*Bombus fervidus*

*Bombus griseocollis*

*Bombus impatience*

*Bombus rufosphinctus*

*Bombus sandersoni*

*Ceratina calcarata*

*Ceratina dupla*

*Ceratina mikmaqi*

*Ceratina strenua*

*Coelioxys spp*

*Colletes spp*

*Eucera atriventris*

*Florilegus condiginus*

*Halictus confusus*

*Halictus ligatus*

*Halictus parallelus*

*Halictus rubicundus*

*Hylaeus affinus*

*Hylaeus annulatus*

*Hylaeus floridanus*

*Hylaeus mesillae*

*Hylaeus rudbeckiae*

*Lasioglossum albepenne*

*Lasioglossum anomalum*

*Lasioglossum atwoodi*

*Lasioglossum atwoodii*

*Lasioglossum bruneri*

*Lasioglossum cattelae*

*Lasioglossum coreopsis*

*Lasioglossum corerulevum*

*Lasioglossum coriaceum*

*Lasioglossum cressoni*

*Lasioglossum divergens*

*Lasioglossum egregium*

*Lasioglossum hartii*

*Lasioglossum illinosese*

*Lasioglossum imatatum*

*Lasioglossum leucozonium*

*Lasioglossum lineatulum*

*Lasioglossum michiganense*

*Lasioglossum nigrovirde*

*Lasioglossum nymphacorum*

*Lasioglossum obscurum*

*Lasioglossum paraforbesii*

*Lasioglossum pilosum*

*Lasioglossum pruinosum*

*Lasioglossum spp*

*Lasioglossum tegulare*

*Lasioglossum timothyi*

*Lasioglossum versans*

*Lasioglossum weems*

*Lasioglossum weemsi*

*Lasioglossum zephyrum*

*Lasioglossum zonulum*

*Megachile inimica*

*Megachile latimanus*

*Megachile melanophoea*

*Megachile mendica*

*Megachile relativa*

*Melissodes agilis*

*Melissodes bimaculatus*

*Melissodes boltonae*

*Melissodes comunis*

*Melissodes dentiventris*

*Melissodes druriellus*

*Melissodes rustica*

*Melissodes tinctus*

*Melissodes trinodis*

*Nomada affabilis*

*Nomada articulata*

*Nomada cressoni*

*Nomada illinoensis pygmaea*

*Osmia sp.*

*Sphecodes sp.*

*Stelis louisae*

*Stelis nitida*
